# Supplementary material
Source: ML conference proceedings conference paper supplement (https://openreview.net/forum?id=2RoX59ldUP)

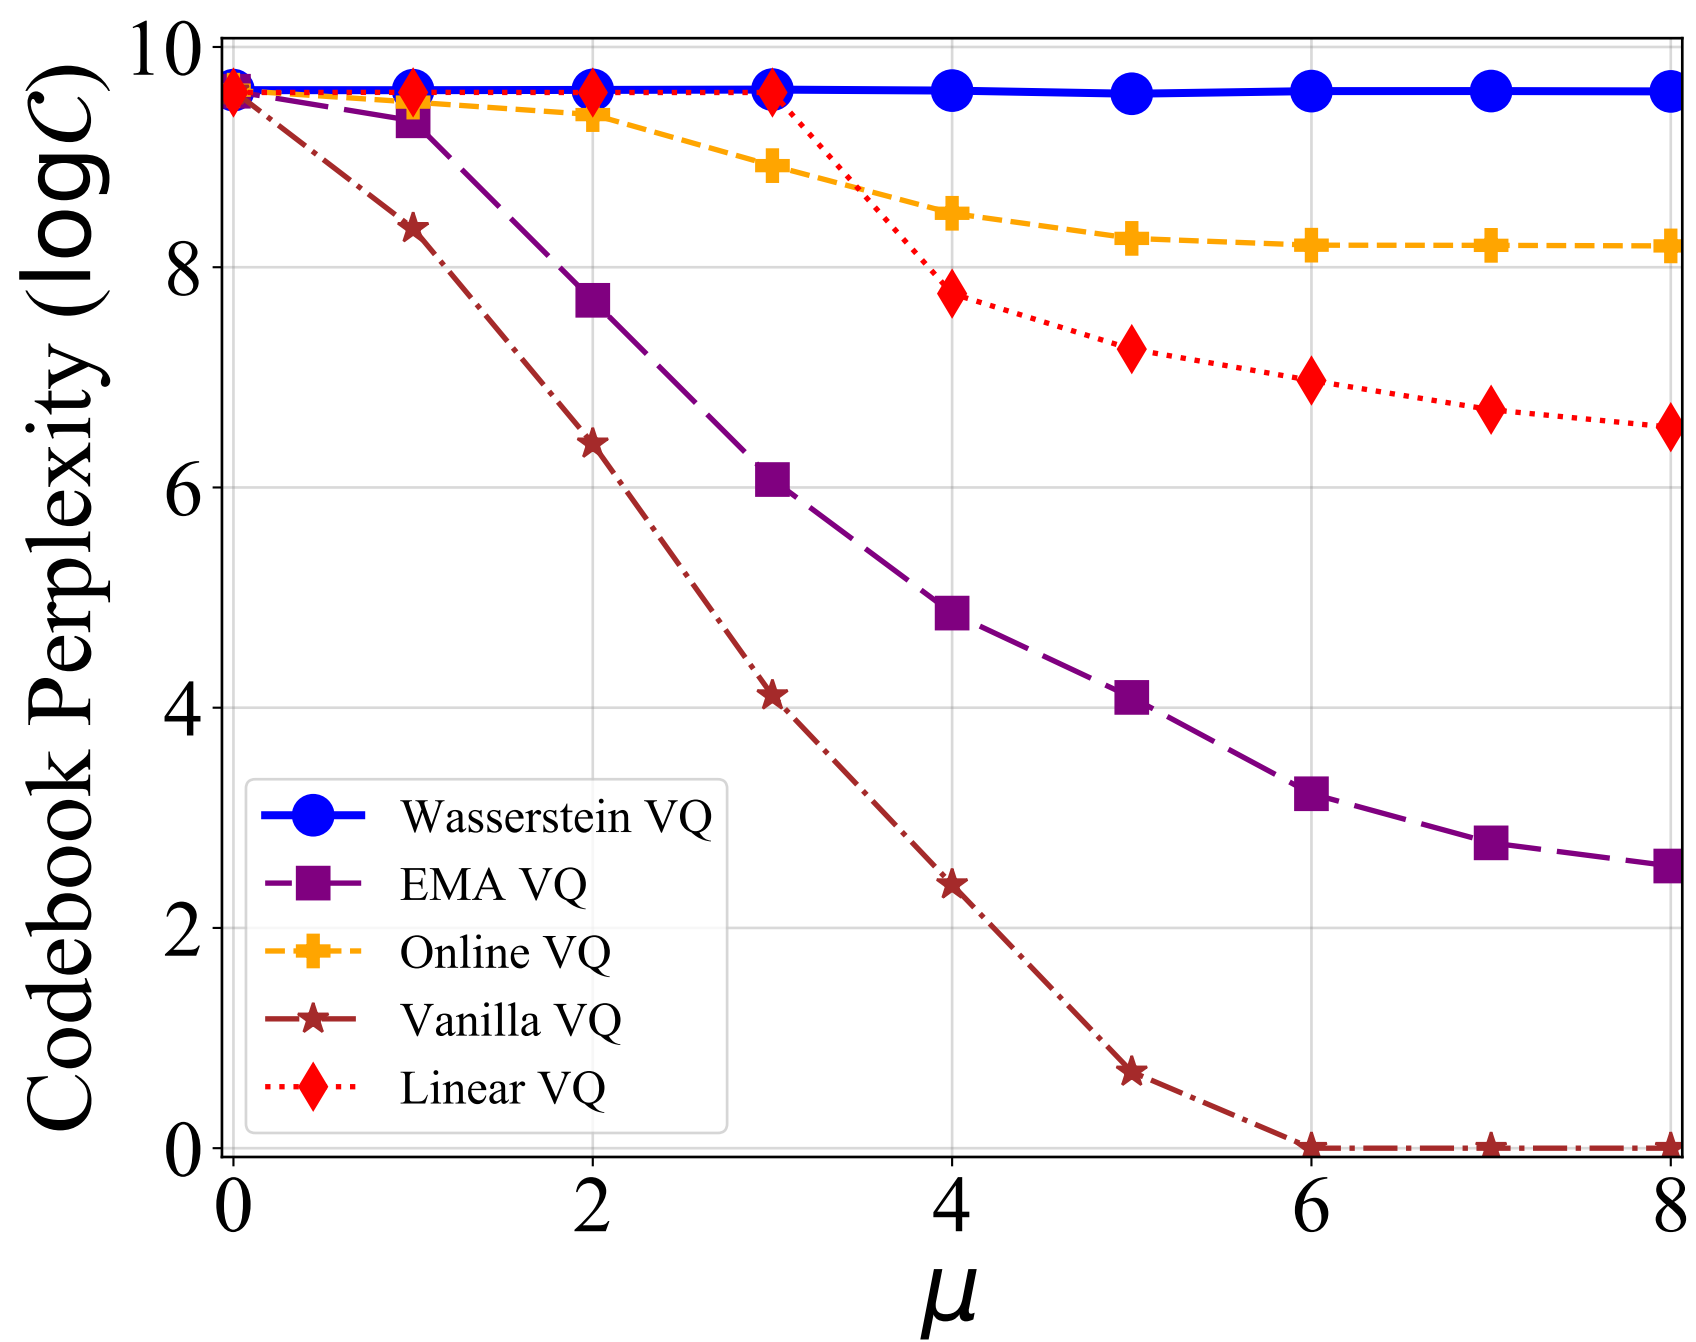

Supplement: supplementary_material [file codebook_perplexity_mu_analysis.pdf › Figure 11 code/GaussianDistribution/plots/codebook_perplexity_mu_analysis.pdf]

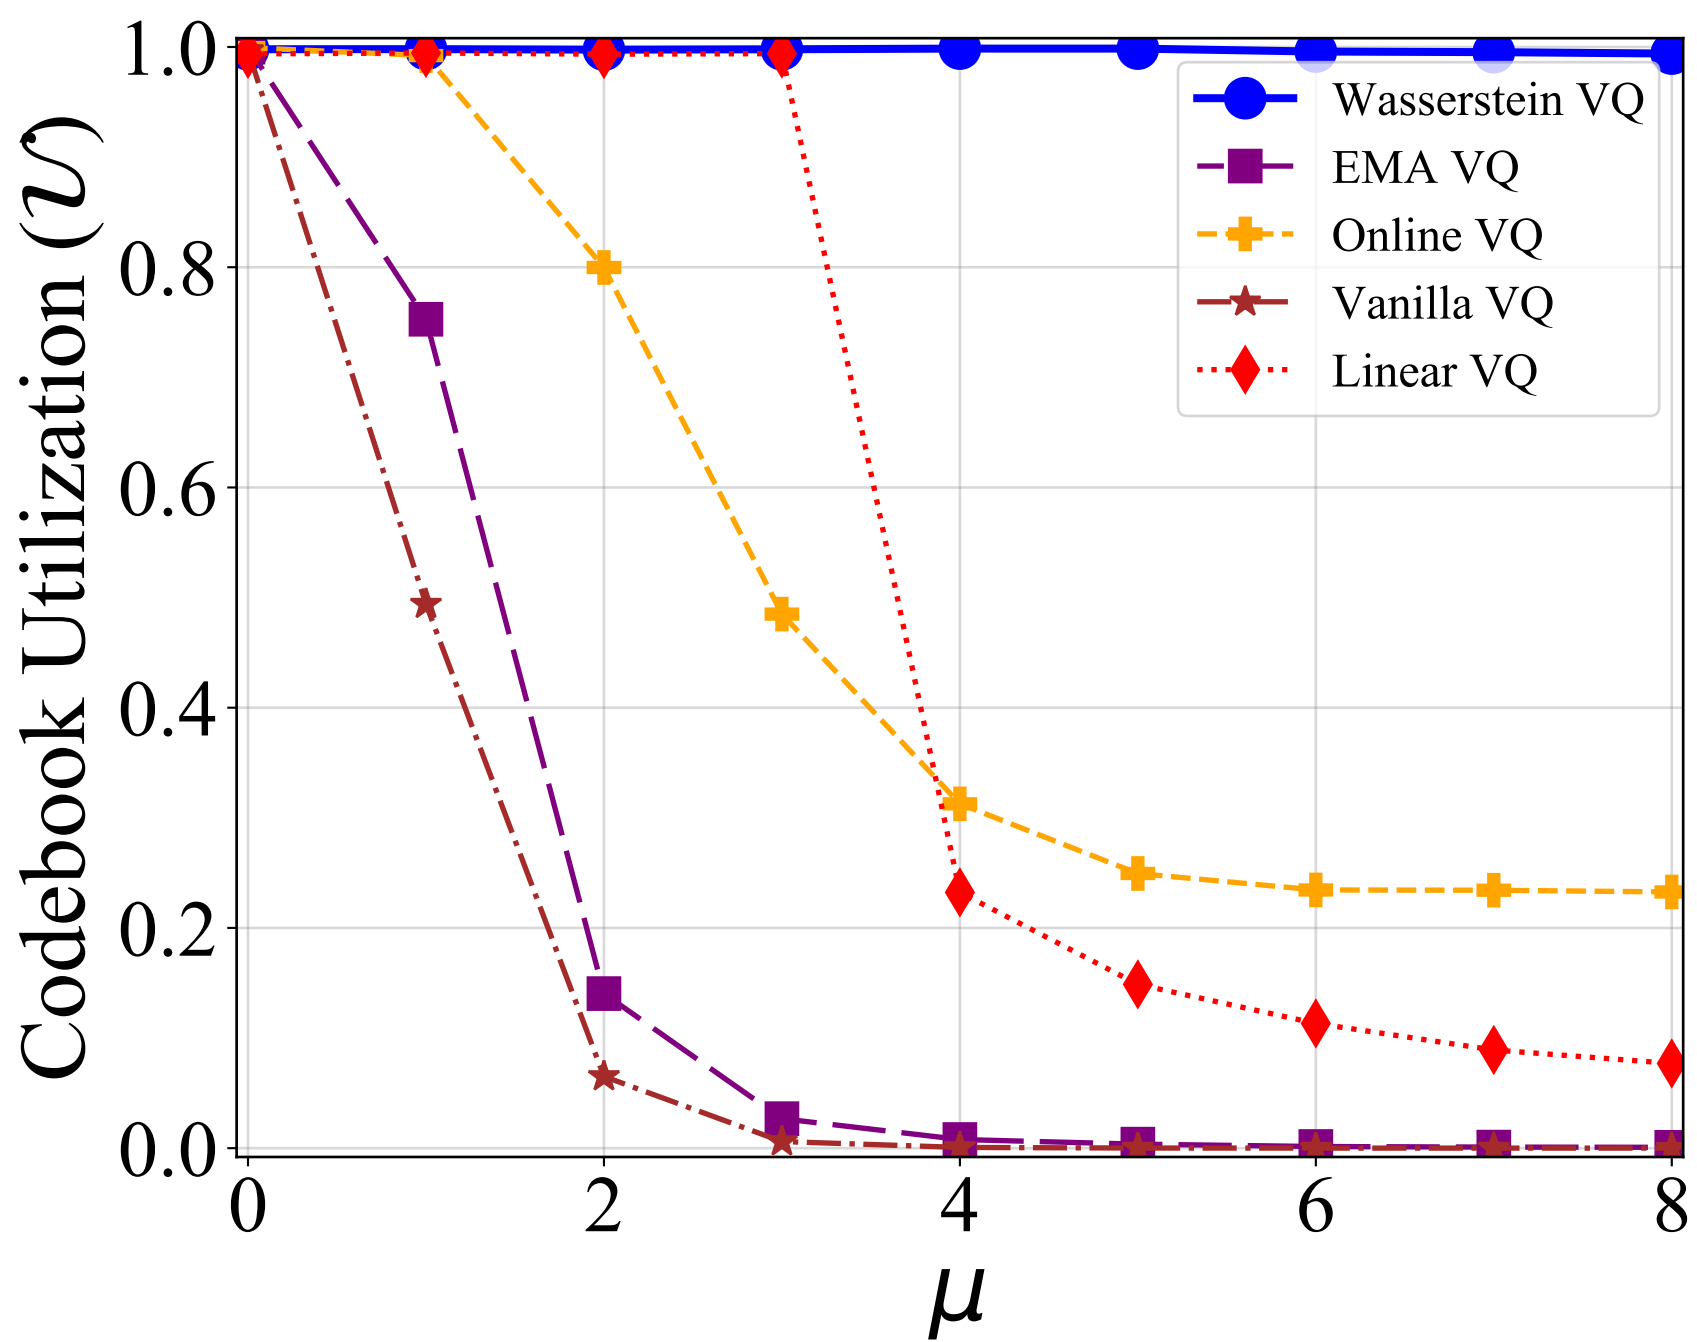

Supplement: supplementary_material [file codebook_utilization_mu_analysis.pdf › Figure 11 code/GaussianDistribution/plots/codebook_utilization_mu_analysis.pdf]

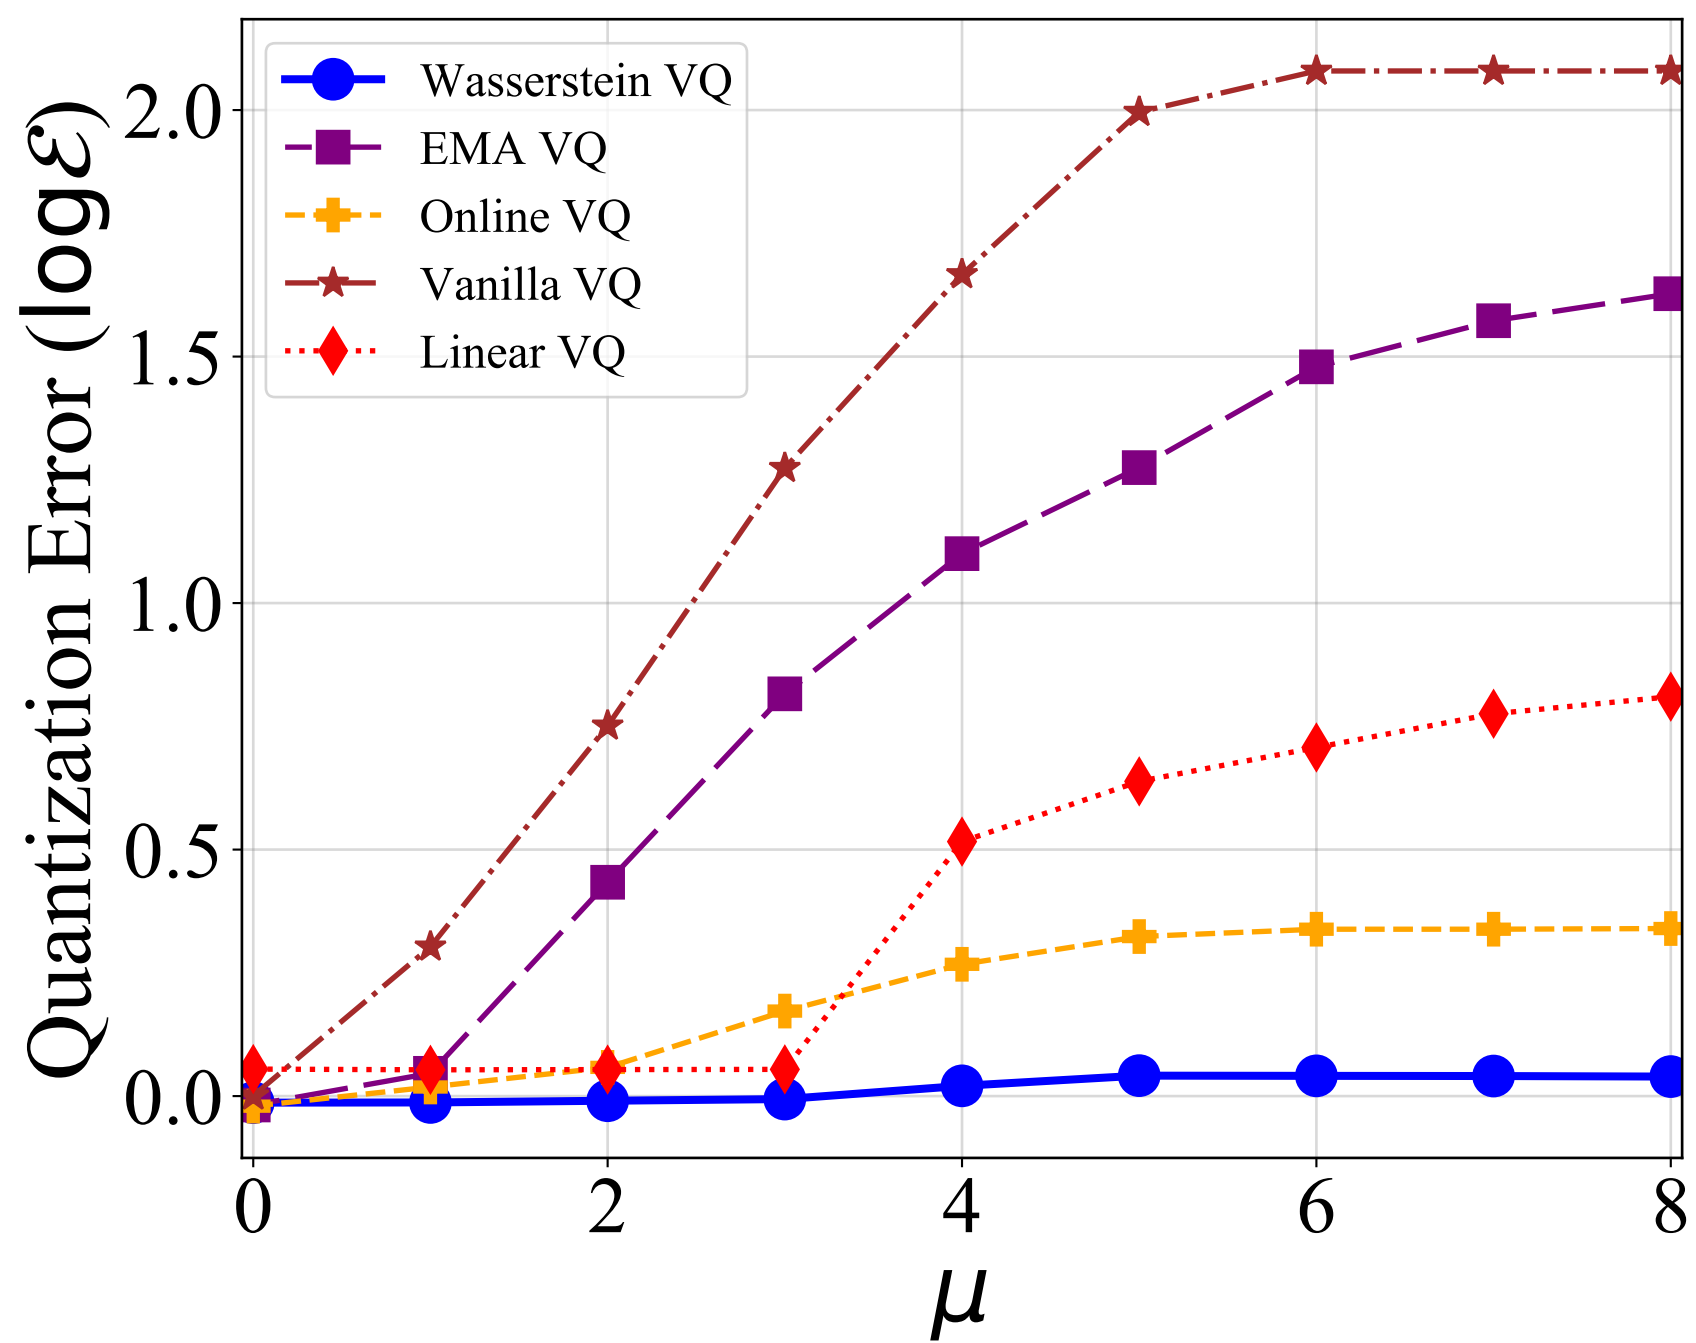

Supplement: supplementary_material [file quantization_error_mu_analysis.pdf › Figure 11 code/GaussianDistribution/plots/quantization_error_mu_analysis.pdf]

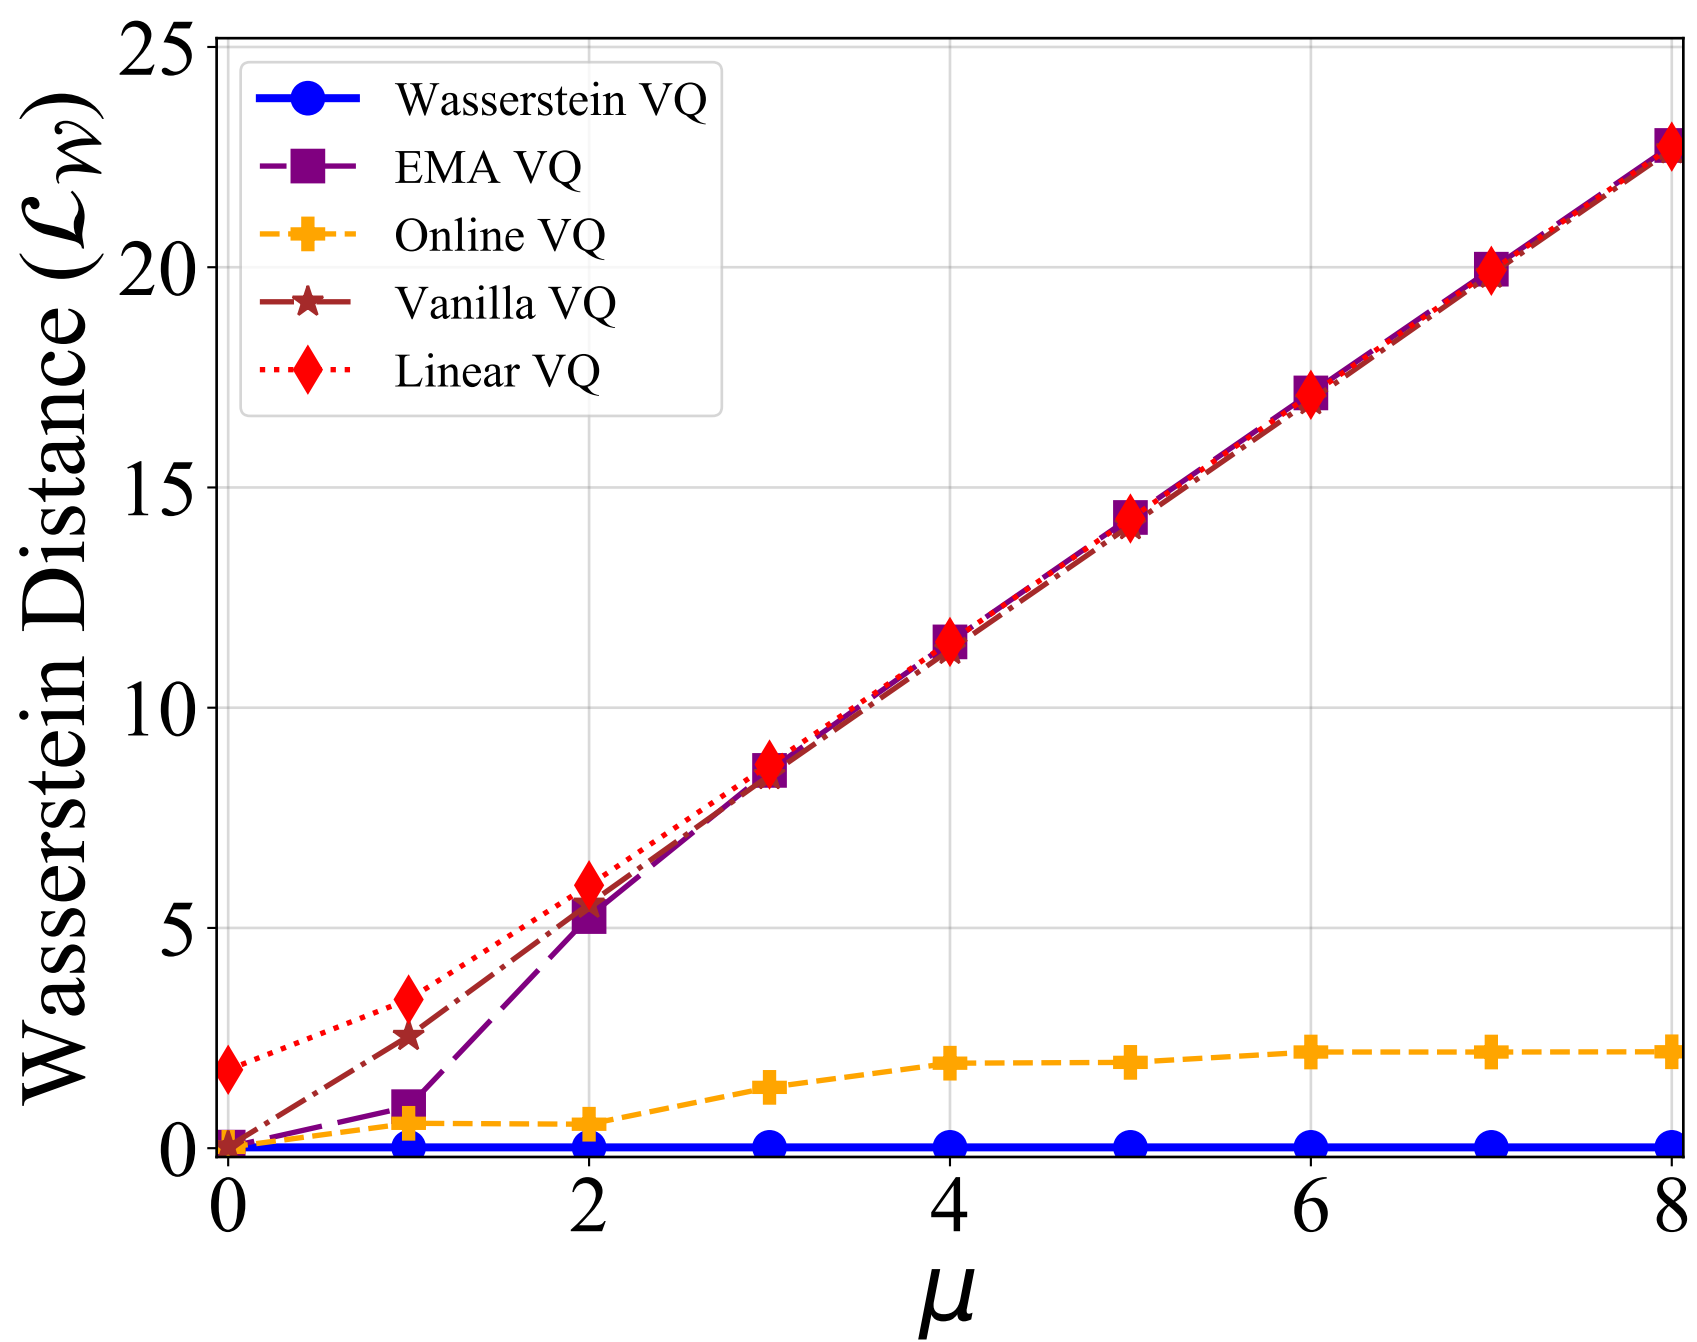

Supplement: supplementary_material [file wasserstein_distance_mu_analysis.pdf › Figure 11 code/GaussianDistribution/plots/wasserstein_distance_mu_analysis.pdf]

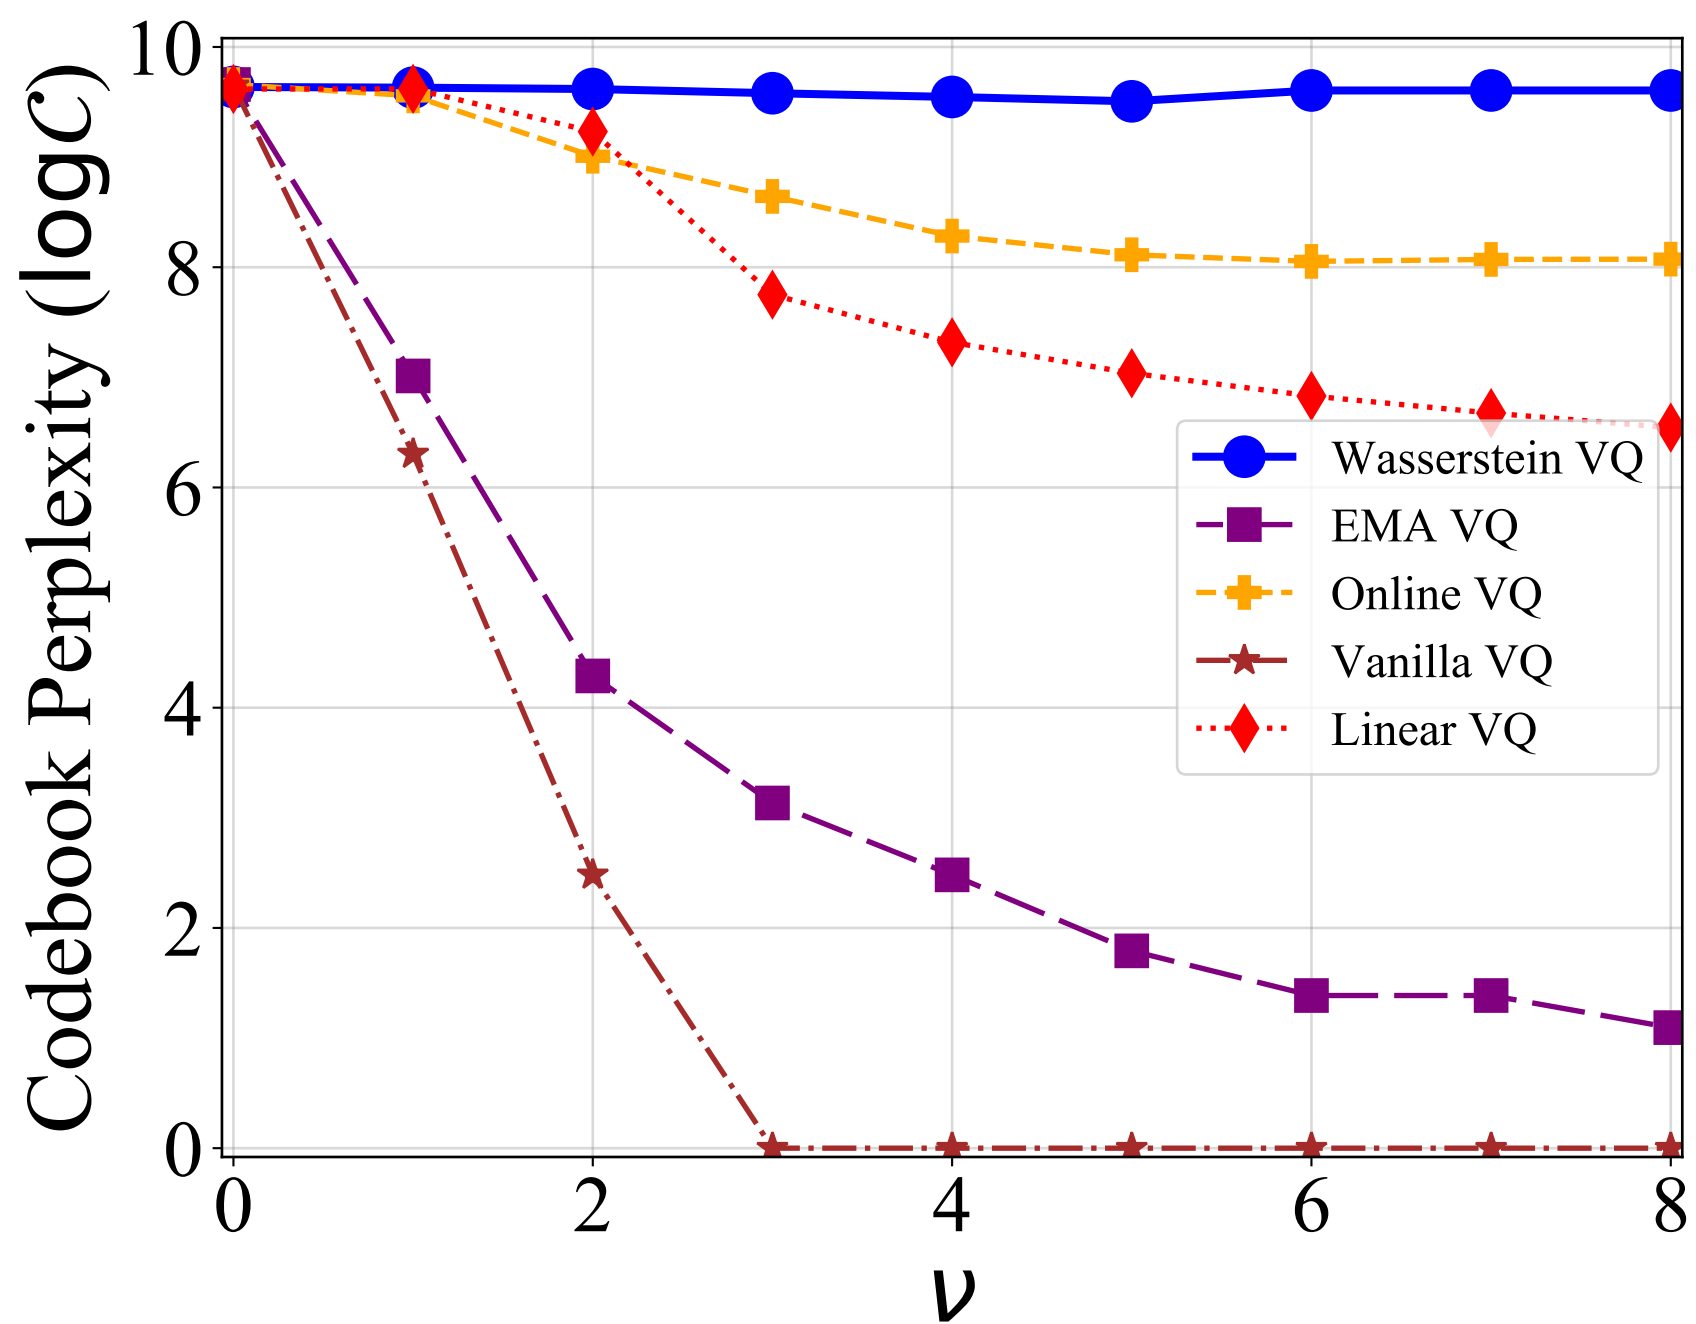

Supplement: supplementary_material [file codebook_perplexity_mu_analysis.pdf › Figure 11 code/UniformDistribution/plots/codebook_perplexity_mu_analysis.pdf]

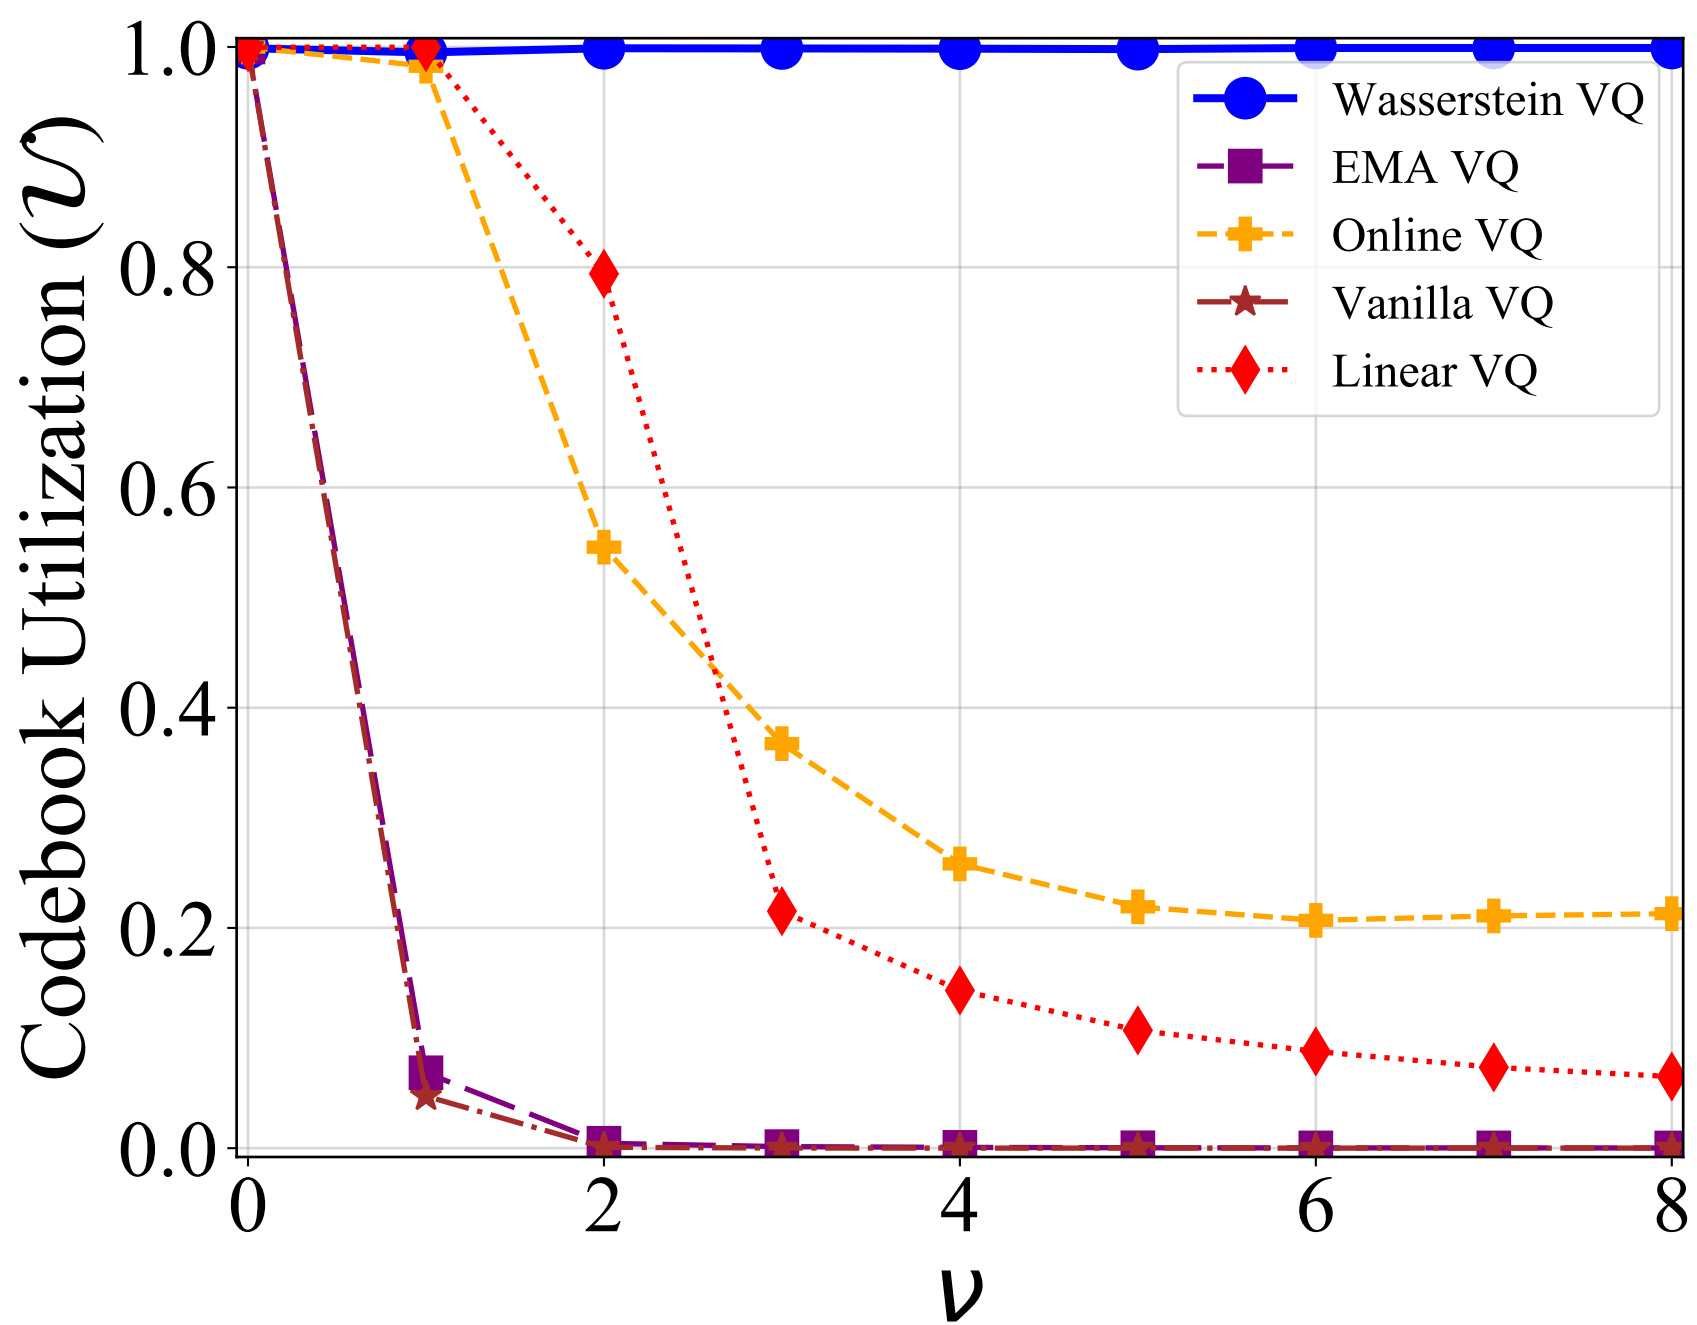

Supplement: supplementary_material [file codebook_utilization_mu_analysis.pdf › Figure 11 code/UniformDistribution/plots/codebook_utilization_mu_analysis.pdf]

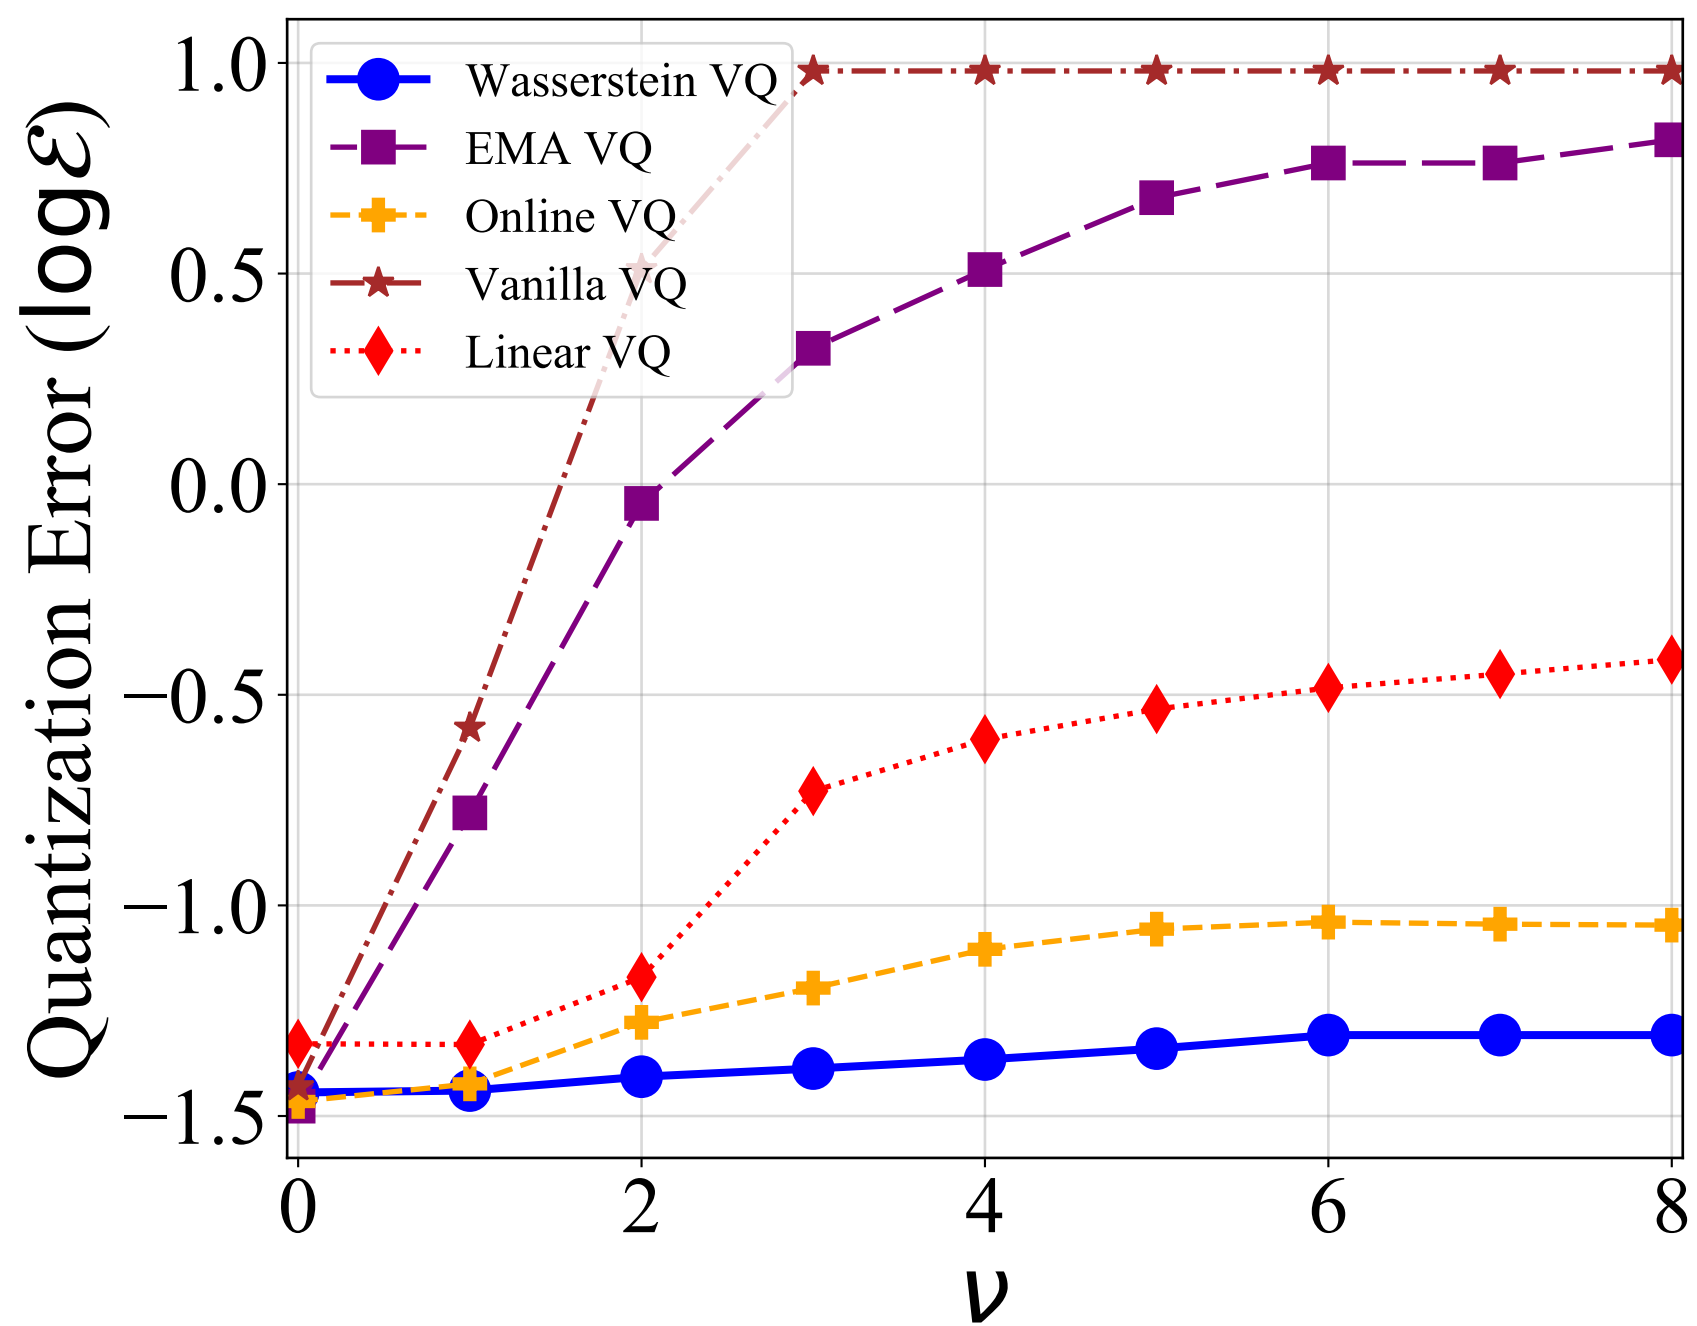

Supplement: supplementary_material [file quantization_error_mu_analysis.pdf › Figure 11 code/UniformDistribution/plots/quantization_error_mu_analysis.pdf]

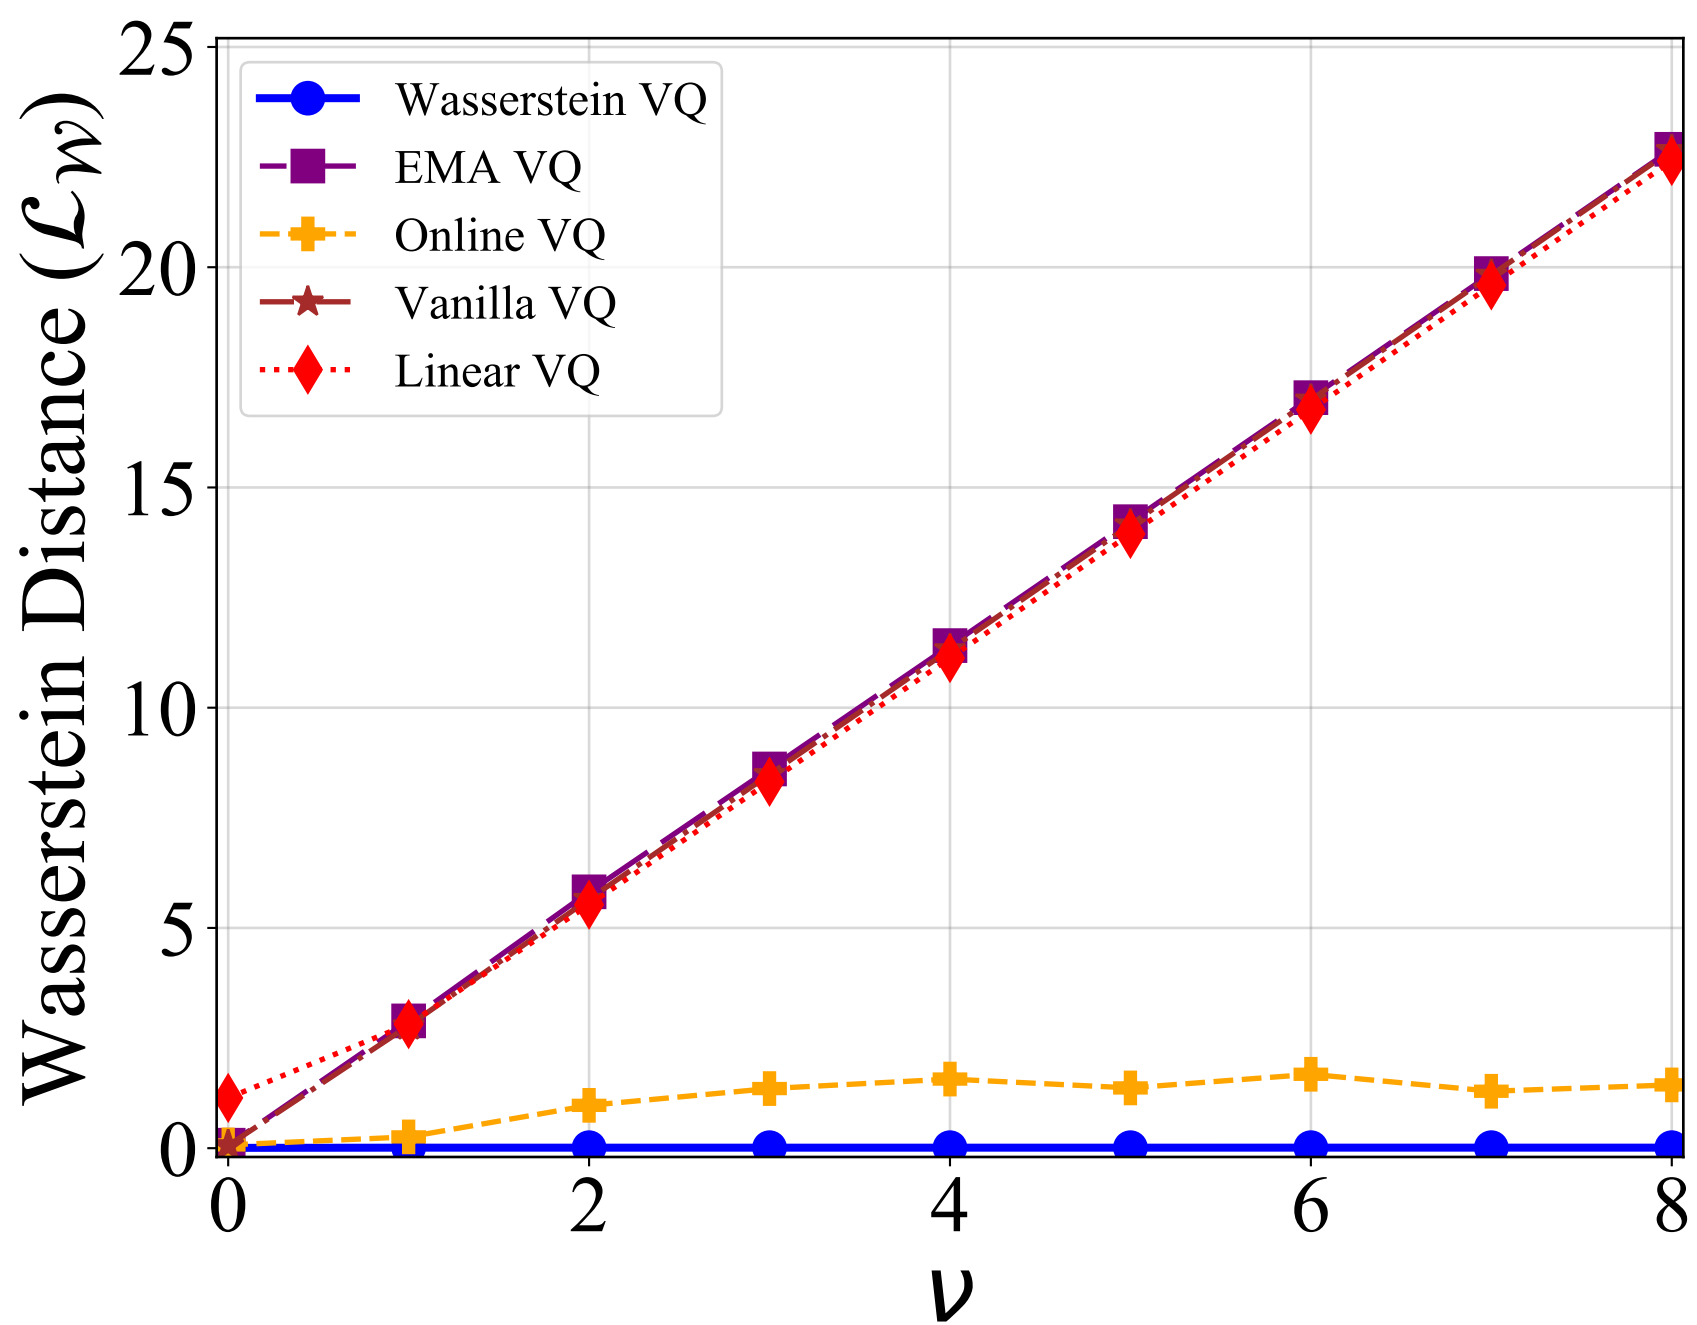

Supplement: supplementary_material [file wasserstein_distance_mu_analysis.pdf › Figure 11 code/UniformDistribution/plots/wasserstein_distance_mu_analysis.pdf]
